# Supplementary material for: Zn–Fe-layered double hydroxide intercalated with vanadate and molybdate anions for electrocatalytic water oxidation
Source: Royal Society of Chemistry journal article supplement (doi:10.1039/c7nj04469k), 2018-01-01
Supplement: c7nj04469k1.pdf [file c7nj04469k1.pdf]

## Electronic Supplementary Informations

### **Zn-Fe-layered double hydroxide intercalated with Vanadate and Molybdate anions for electrocatalytic water oxidation**

Kamellia Nejati<sup>\*a</sup>, Ali Reza akbari<sup>a</sup>, Soheila Davari<sup>a</sup>, Karim Asadpour-Zeynali<sup>b</sup>, Zolfaghar Rezvani<sup>c</sup>,

<sup>a</sup>Chemistry Department, Payame Noor University, PO Box 19395-3697 Tehran, Iran

<sup>b</sup>Department of Analytical Chemistry, Faculty of Chemistry, University of Tabriz, Tabriz 51666-16471, Iran

<sup>c</sup>Department of Chemistry, Faculty of Basic Sciences, Azarbaijan Shahid Madani University, Tabriz, Iran

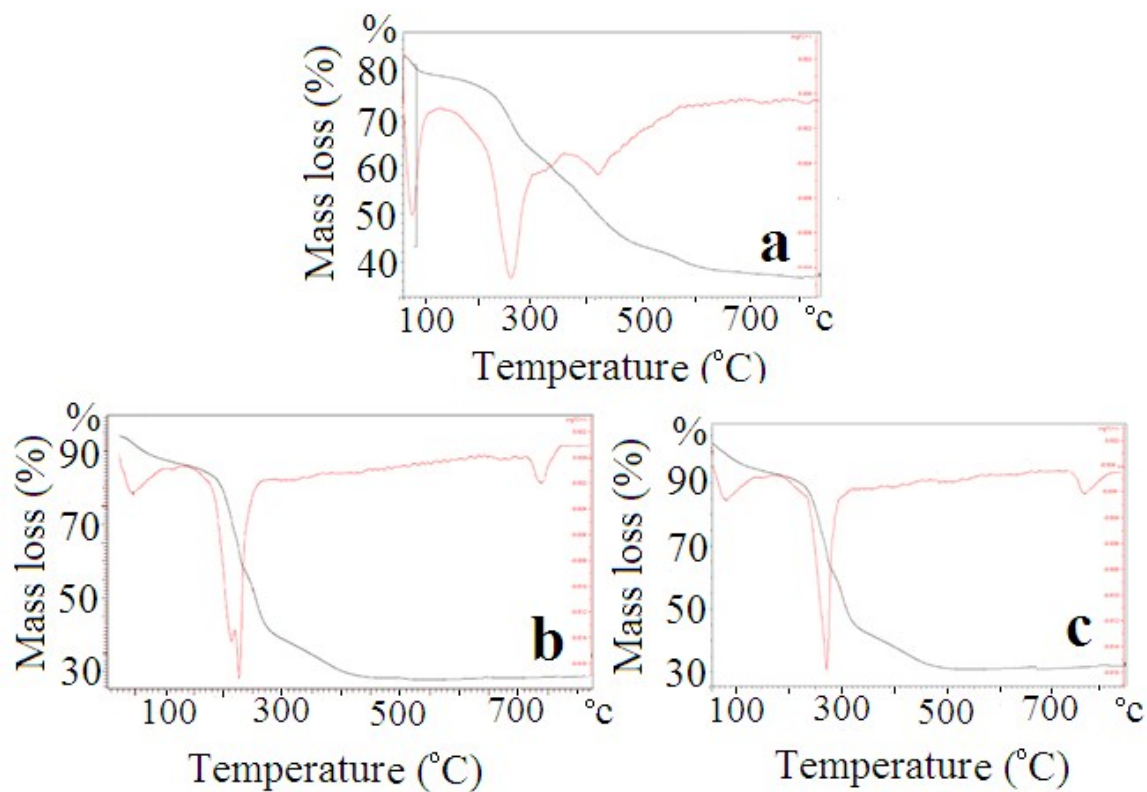

Fig. S1. TG and DTG curves of for Zn-Fe-NO<sub>3</sub>-LDH precursor (a), Zn-Fe-MoO<sub>4</sub>-LDH (b) and Zn-Fe-VO<sub>4</sub>-LDH (c)

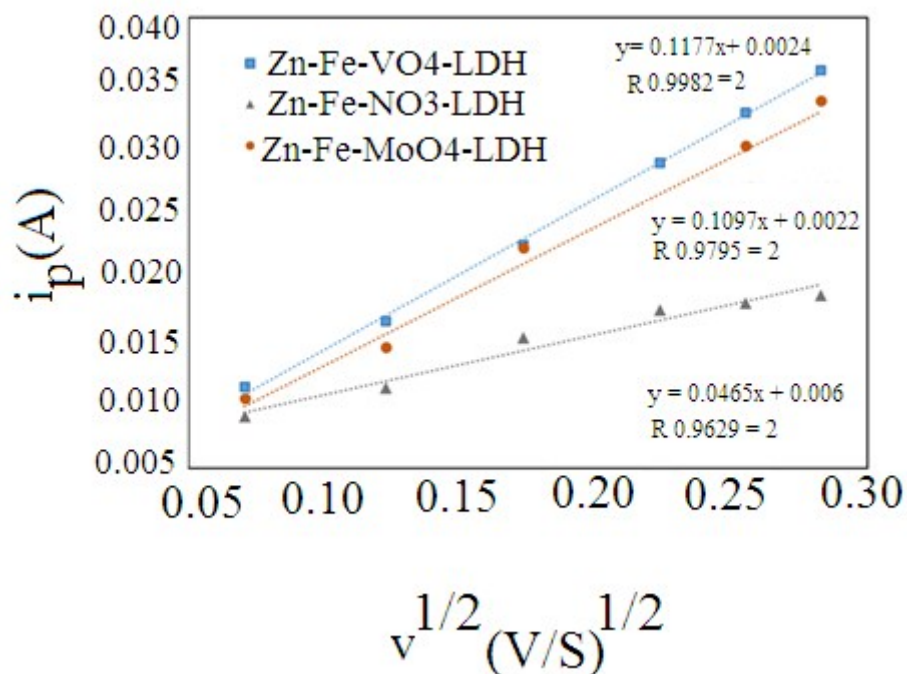

Fig. S2. curve of  $i_p$  versus  $v^{1/2}$  in 0.1 molL<sup>-1</sup> KCl solution containing 1 mmolL<sup>-1</sup> Fe(CN)<sub>6</sub><sup>3-/4-</sup>

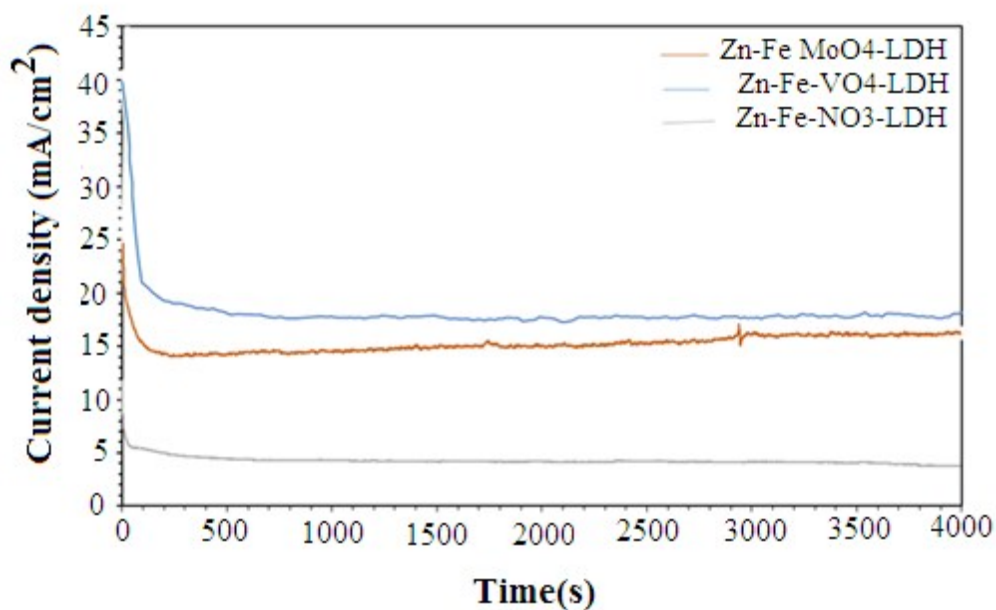

Fig. S3. Chronoamperometry curves of Zn-Fe-VO<sub>4</sub>-LDH, Zn-Fe-MoO<sub>4</sub>-LDH and Zn-Fe-NO<sub>3</sub>-LDH in 1 M KOH at the potential of 2.4 V vs RHE.

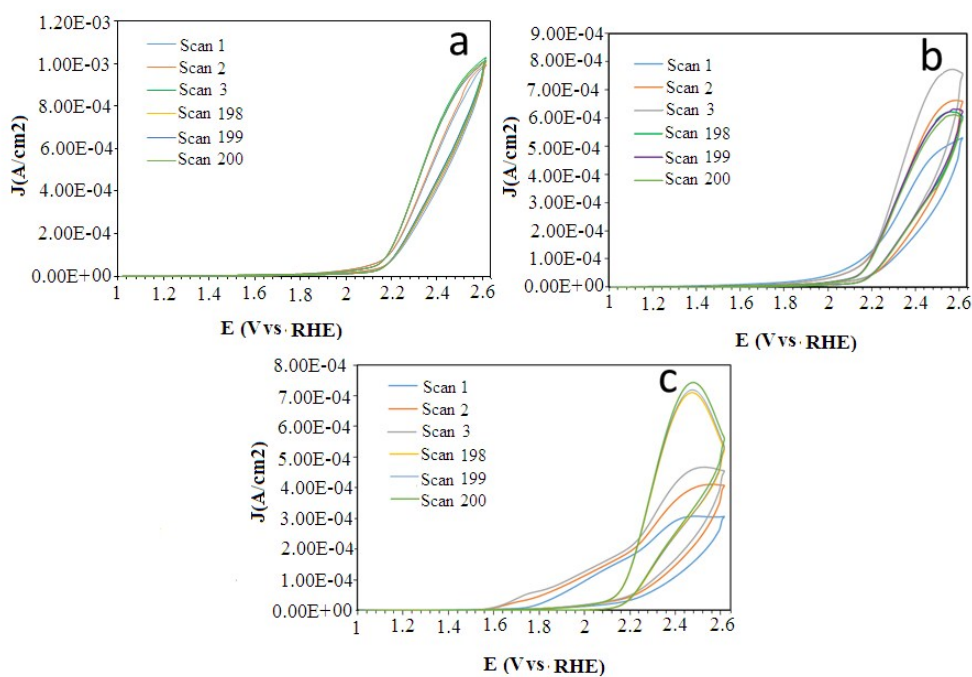

Fig S4. The cyclic voltammograms of Zn-Fe-VO<sub>4</sub>-LDH (a), Zn-Fe-MoO<sub>4</sub>-LDH(b) and Zn-Fe-NO<sub>3</sub>-LDH (c) in 1 M KOH at the Scan rate 0.1V.s<sup>-1</sup>

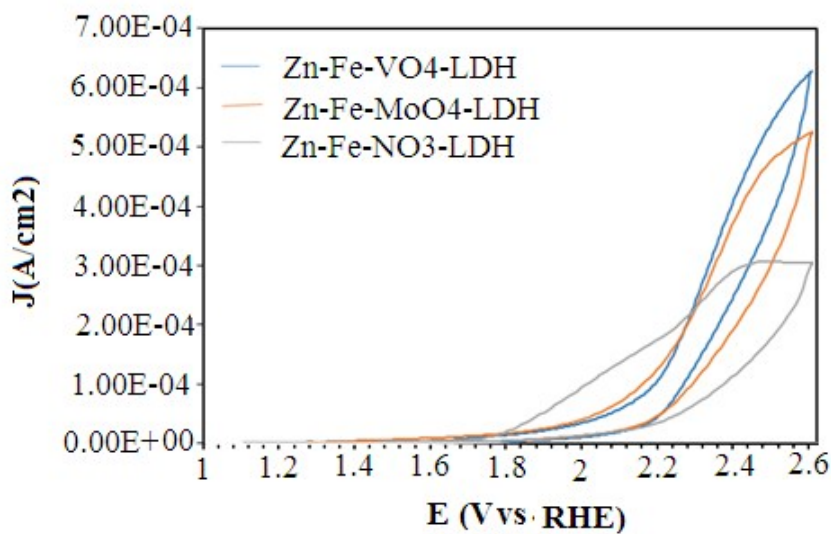

Fig. S5. The cyclic voltammograms of the Zn-Fe-VO<sub>4</sub>-LDH, Zn-Fe-MoO<sub>4</sub>-LDH and Zn-Fe-NO<sub>3</sub>-LDH in the potential range of 1 to 2.8 V (vs. RHE)
